# Supplementary material
Source: publisher site journal article supplement (https://www.dovepress.com/article/403418)
Supplement: Supplementary file 1 [file get_supplementary_file.php]

**Supplementary Methods**

**Figure S1 Dermatological assessment Score for wrinkles- Crows feet**

Photo numeric scale used for scoring wrinkles.

Lower mean value indicates reduction in visibility of wrinkles around crow’s feet area.

The efficacy parameters were assessed on the scale of 0 to 9.

0 = none (best possible condition)

1 to 3 = mild,

4 to 6 = moderate

7 to 9 = severe (worst possible condition)

**Figure S2 Dermatological assessment Score for facial fine lines**

Photo numeric scale used for scoring wrinkles.

Lower mean value indicates reduction in visibility of facial fine lines.

The efficacy parameters were assessed on the scale of 0 to 9. Intermediate scoring was given when necessary to describe the skin condition more accurately.

**Figure S3 Dermatological assessment Score for Skin hydration**

*Higher mean value indicates improvement in skin hydration*

**Figure S4 Details of Instrument assessments**

The table describes the details of instrument assessments, including number of readings, parameter and the visits when the data was collected during the study.
